# Supplementary material
Source: Springer Nature journal article supplement (https://www.springermedizin.de/resource/supplementary/12893_2009_141_MOESM1_ESM.pdf/9513040)
Supplement: MOESM1 [file 9513040]

Left lateral segmentectomies performed in time period  
n=43

Laparoscopic approach  
n=16

Open approach  
n=27

Excluded:  
synchronous procedure n=4  
cirrhosis: n=1  
hand-port assistance n=1

Excluded:  
previous liver surgery n=2  
synchronous procedure n=10  
polycystic liver disease n=3  
cirrhosis n=2

Laparoscopic approach  
n=10

Open approach  
n=10
